# Supplementary material for: Longitudinal study across SARS-CoV-2 variants identifies transcriptionally active microbes (TAMs) associated with Delta severity
Source: PubMed Central journal article supplement (PMC10493601; doi:10.1016/j.isci.2023.107779), 2023-08-29
Supplement: mmc1.pdf [file mmc1.pdf]

iScience, Volume 26

## **Supplemental information**

**Longitudinal study across SARS-CoV-2 variants**

**identifies transcriptionally active microbes**

**(TAMs) associated with Delta severity**

**Priti Devi, Pallawi Kumari, Aanchal Yadav, Bansidhar Tarai, Sandeep Budhiraja, Uzma Shamim, and Rajesh Pandey**

## Supplementary Figure S1

(i)

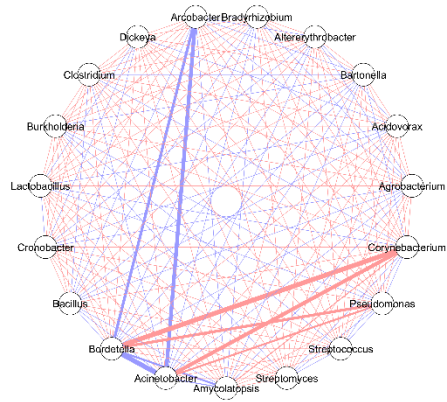

(ii)

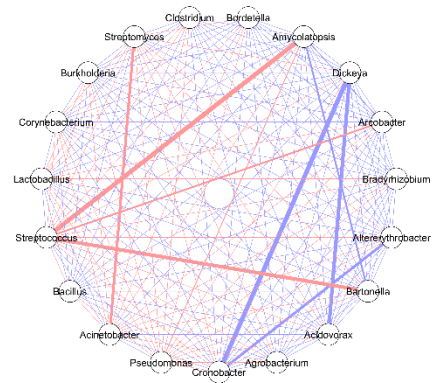

(iii)

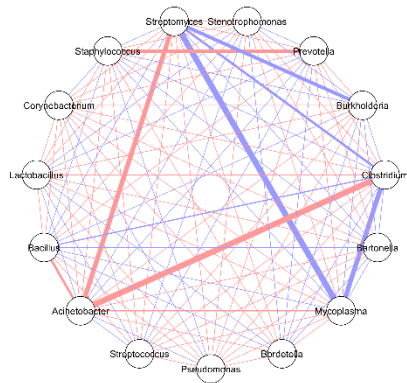

(iv)

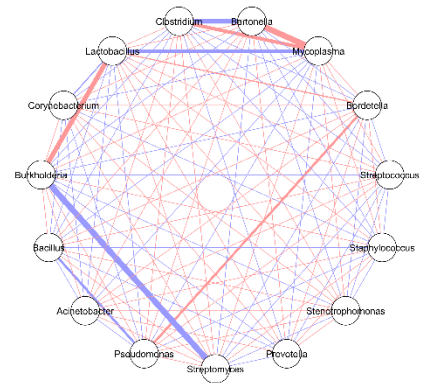

**Figure S1: Visualization of co-occurrence network based on spearman correlation analysis between the different genera across different groups. Related to Figure 2.** Specific interactions between the different genera of i) Pre-VOC, ii) VOCs, iii) Delta, iv) Omicron wherein the edges represent the strength of correlation and their colours shows positive and negative as blue and red, respectively.

# Supplementary Figure S2

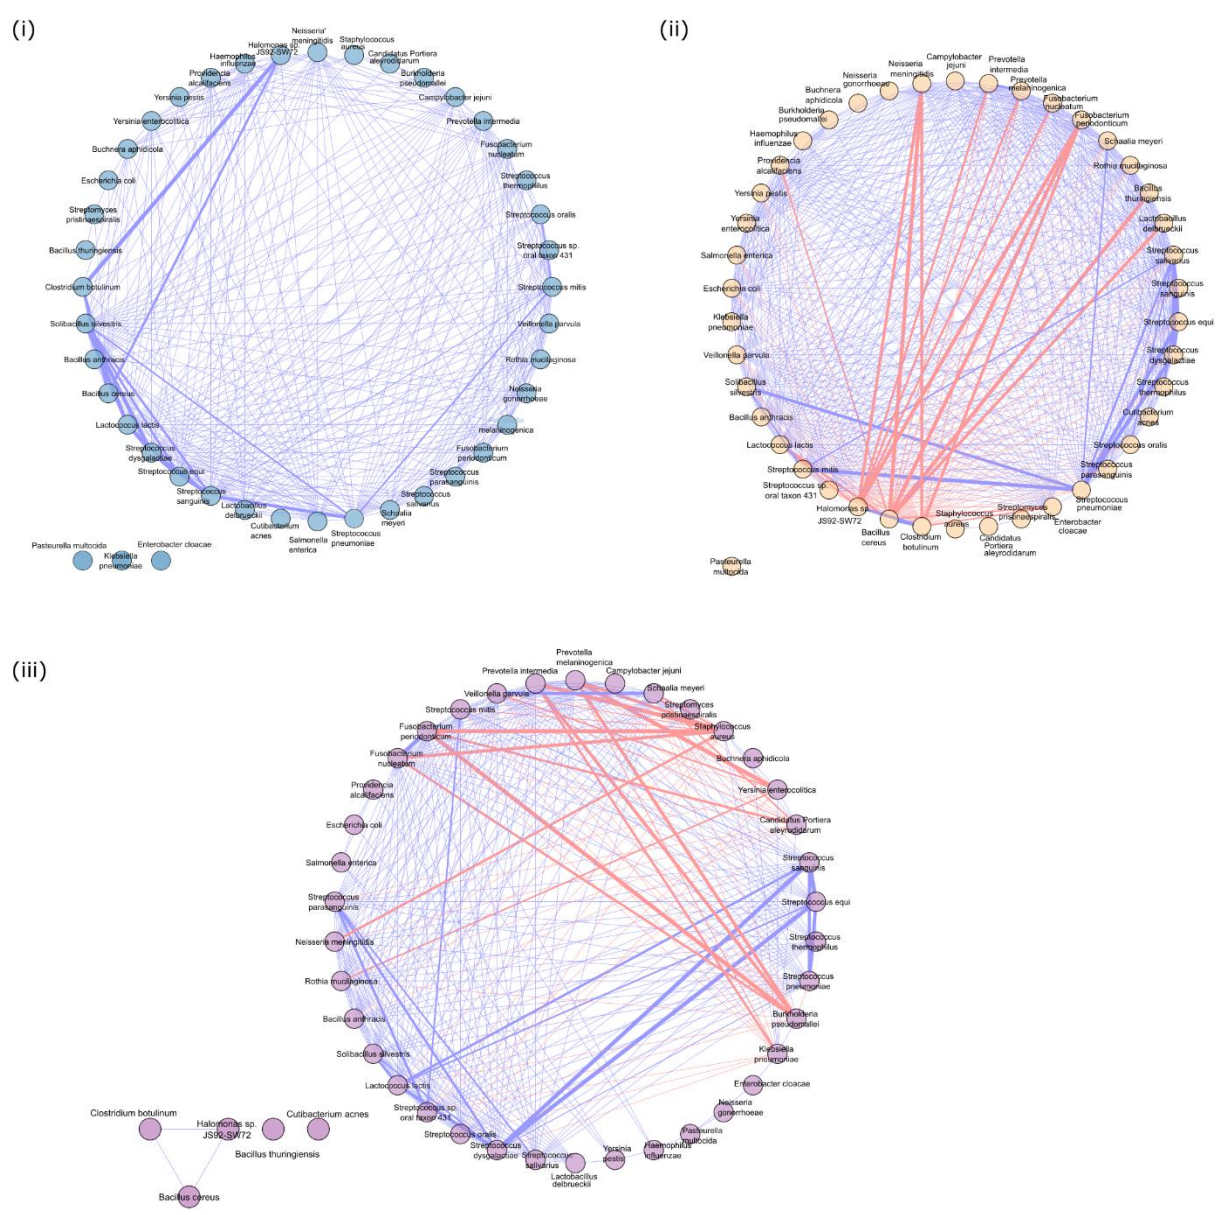

**Figure S2: Visualization of co-occurrence network based on spearman correlation analysis between the core bacterial species across different groups shows significant ( $p < 0.05$ ,  $r > \pm 0.6$ ) specific interaction. Related to Figure 3A. i) Pre-VOC, ii) Delta, iii) Omicron wherein the edges represent the strength of correlation and their colors shows positive and negative as blue and red, respectively.**

# Supplementary Figure S3

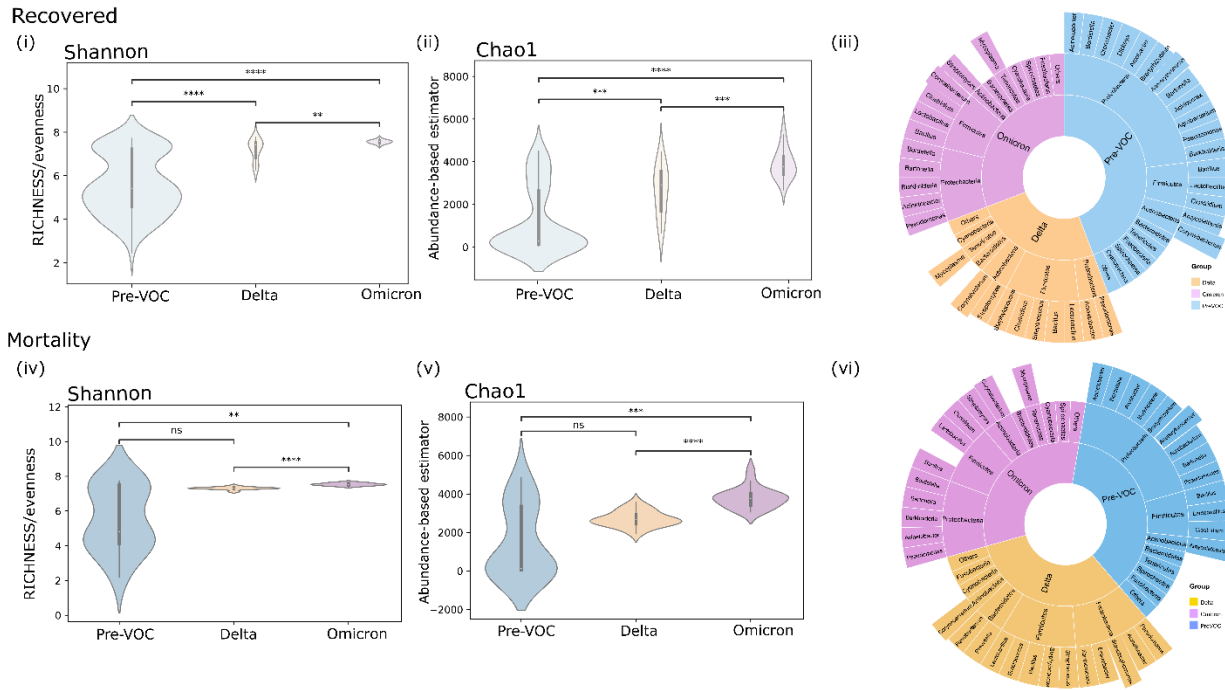

**Figure S3: Figure illustrating the alpha diversity and abundance profile of phyla and genera for recovered and mortality sub-groups of Pre-VOC, Delta and Omicron. Related to Figure 5: i) Shannon (Richness), (ii) Chao-1 (Abundance-based estimator) with *p-values* calculated by the Kruskal Wallis test, (iii) Visualization of percent relative abundance proportion of phyla and genera identified in recovered subgroup: iv) Shannon (Richness), (v) Chao-1 (Abundance-based estimator) with *p-values* calculated by the Kruskal Wallis test, (vi) Visualization of percent relative abundance proportion of phyla and genera identified in mortality subgroup of Pre-VOC, Delta and Omicron.**
